# Supplementary material
Source: PubMed Central journal article supplement (PMC9189060)

extfig\_2c.jpg (1/1)

2184 x 1472

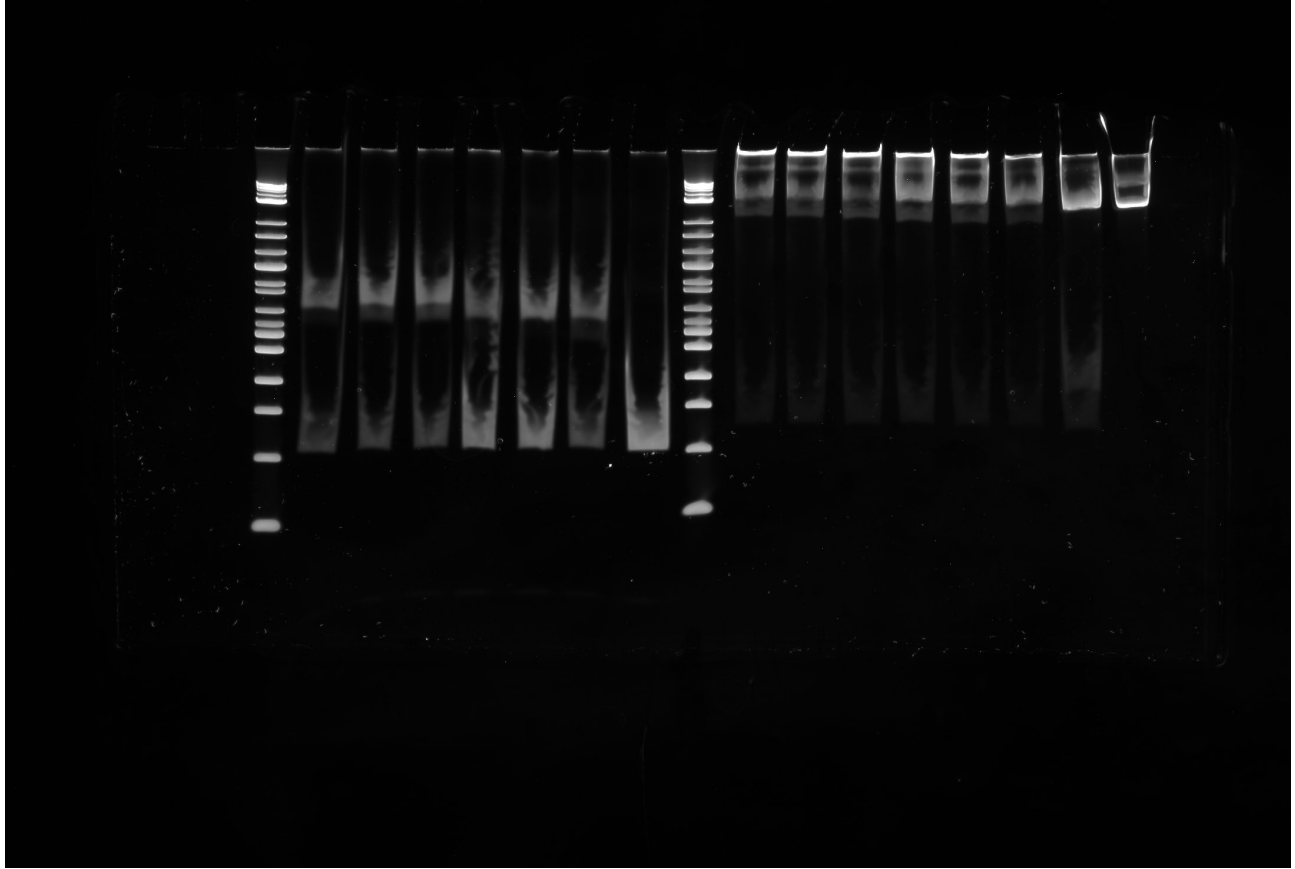

extfig\_2d\_1\_top\_left\_CENPAchromatin\_DNA.jpg (1/1)

1024 x 1024

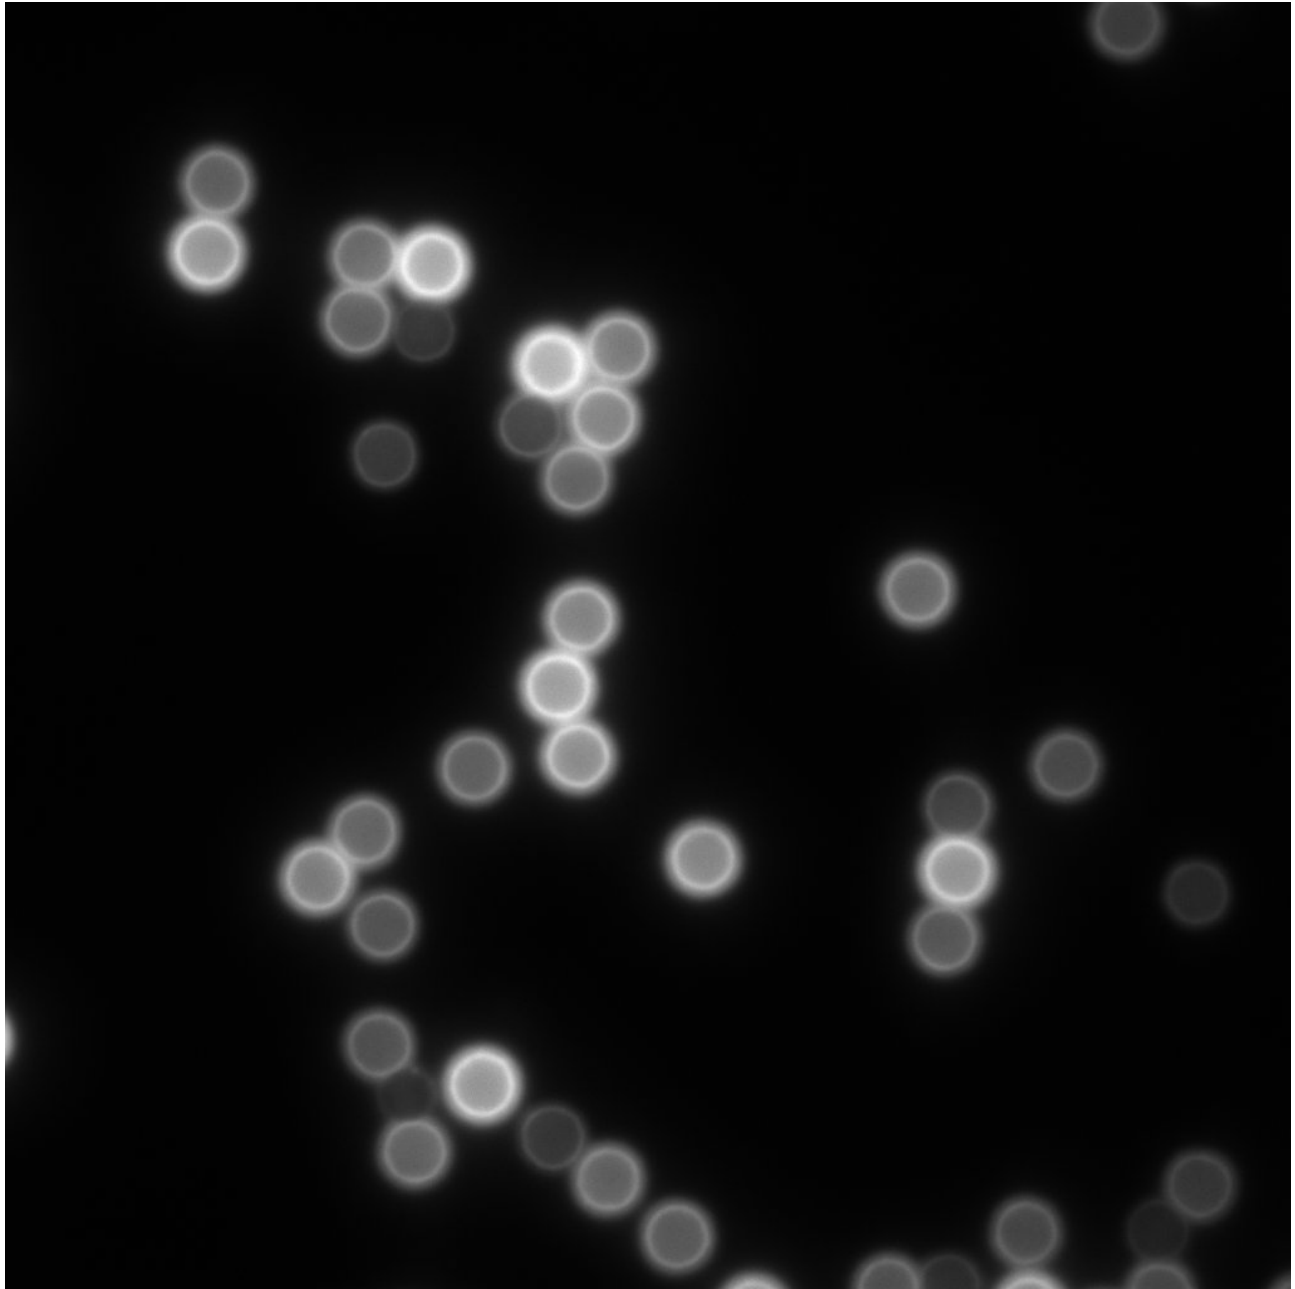

extfig\_2d\_2\_top\_right\_CENPAchromatin\_methyladenosine.jpg (1/1)

1024 x 1024

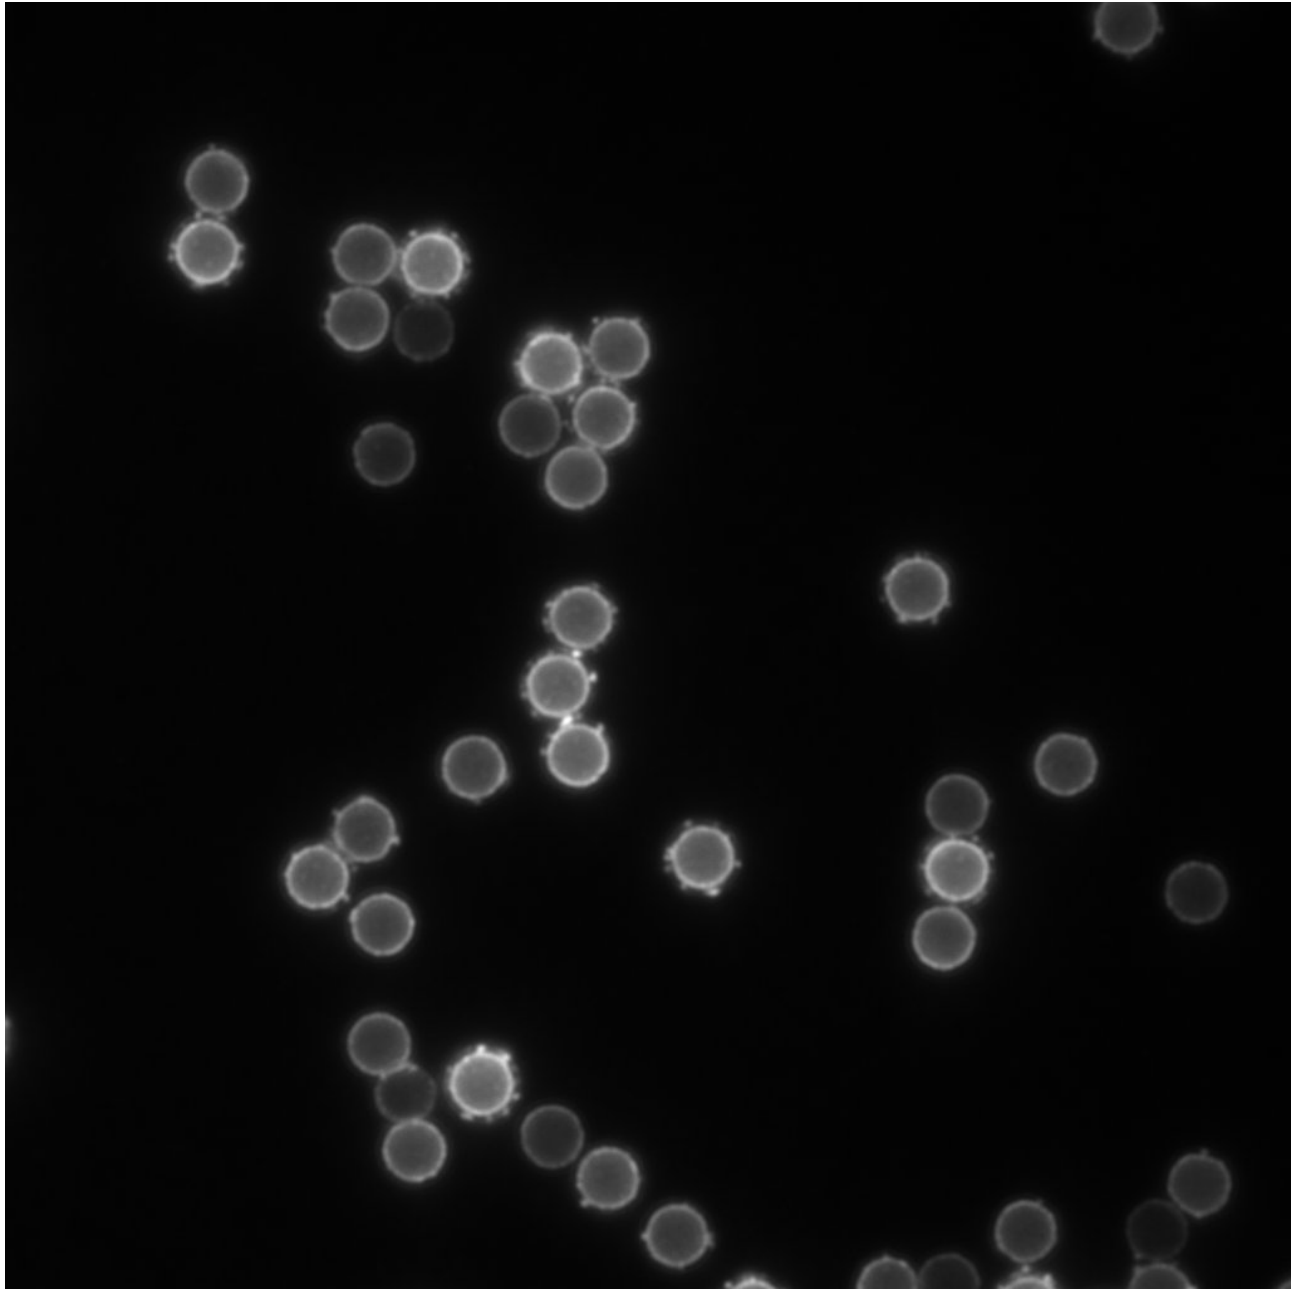

extfig\_2d\_3\_bottom\_left\_H3chromatin\_DNA.jpg (1/1)

1024 x 1024

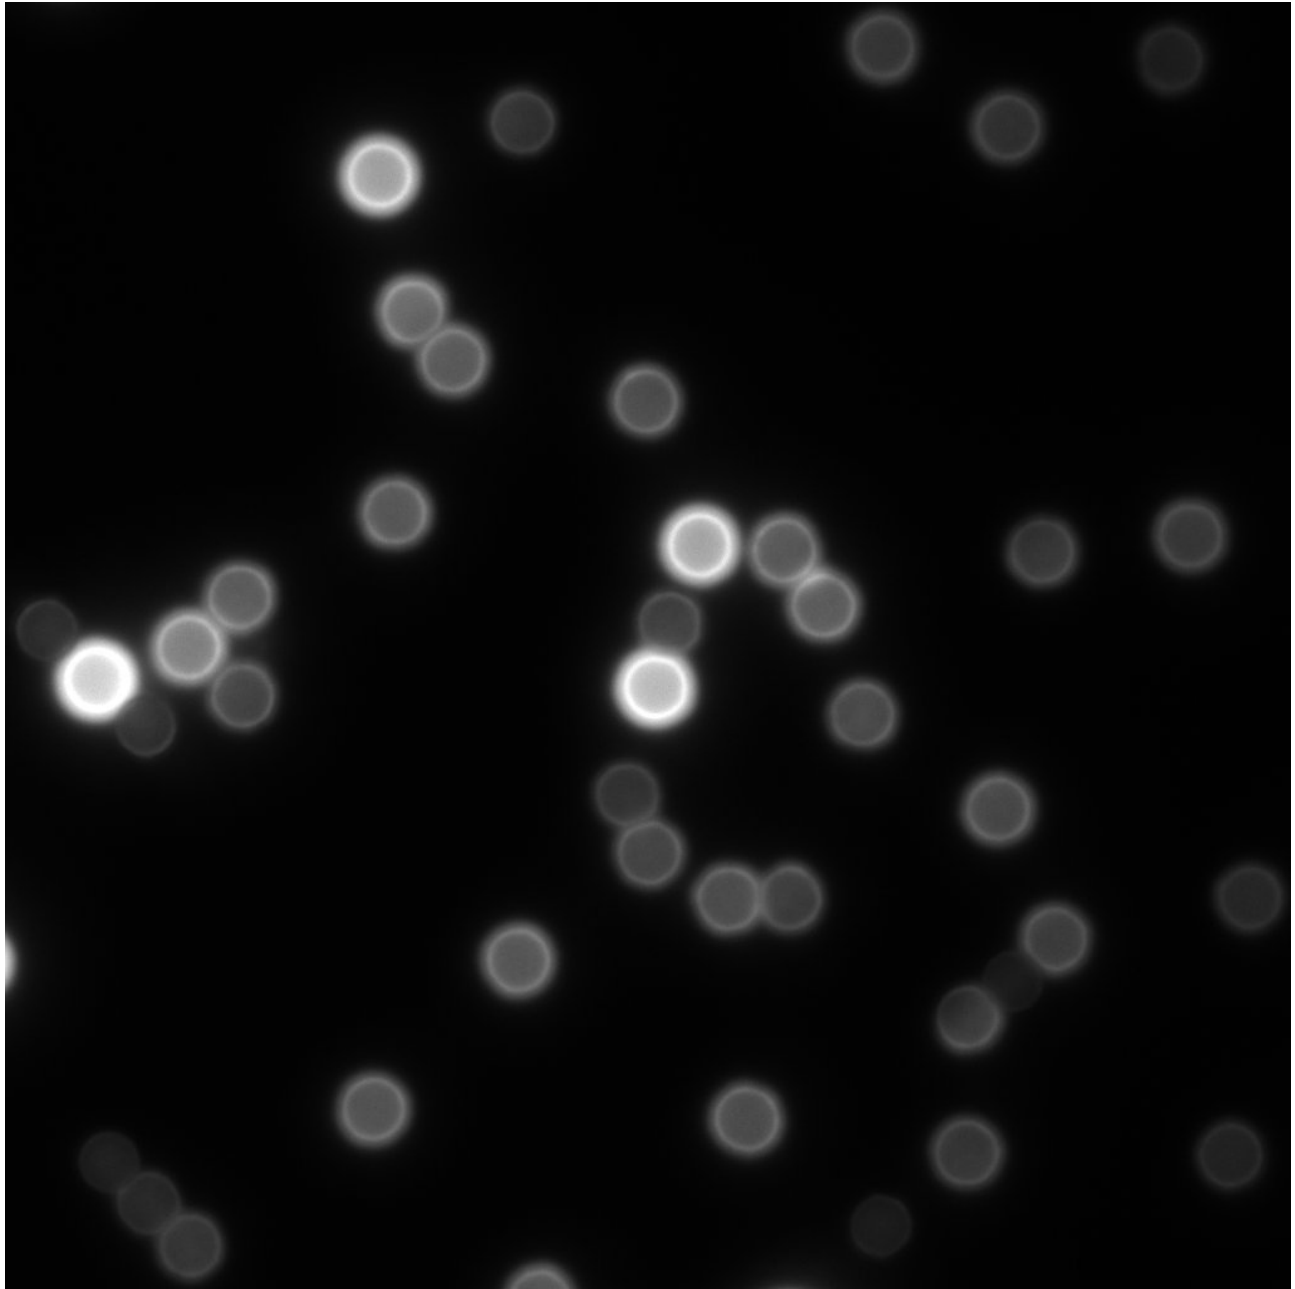

extfig\_2d\_4\_bottom\_right\_H3chromatin\_methyladenosine.jpg (1/1)

1024 x 1024

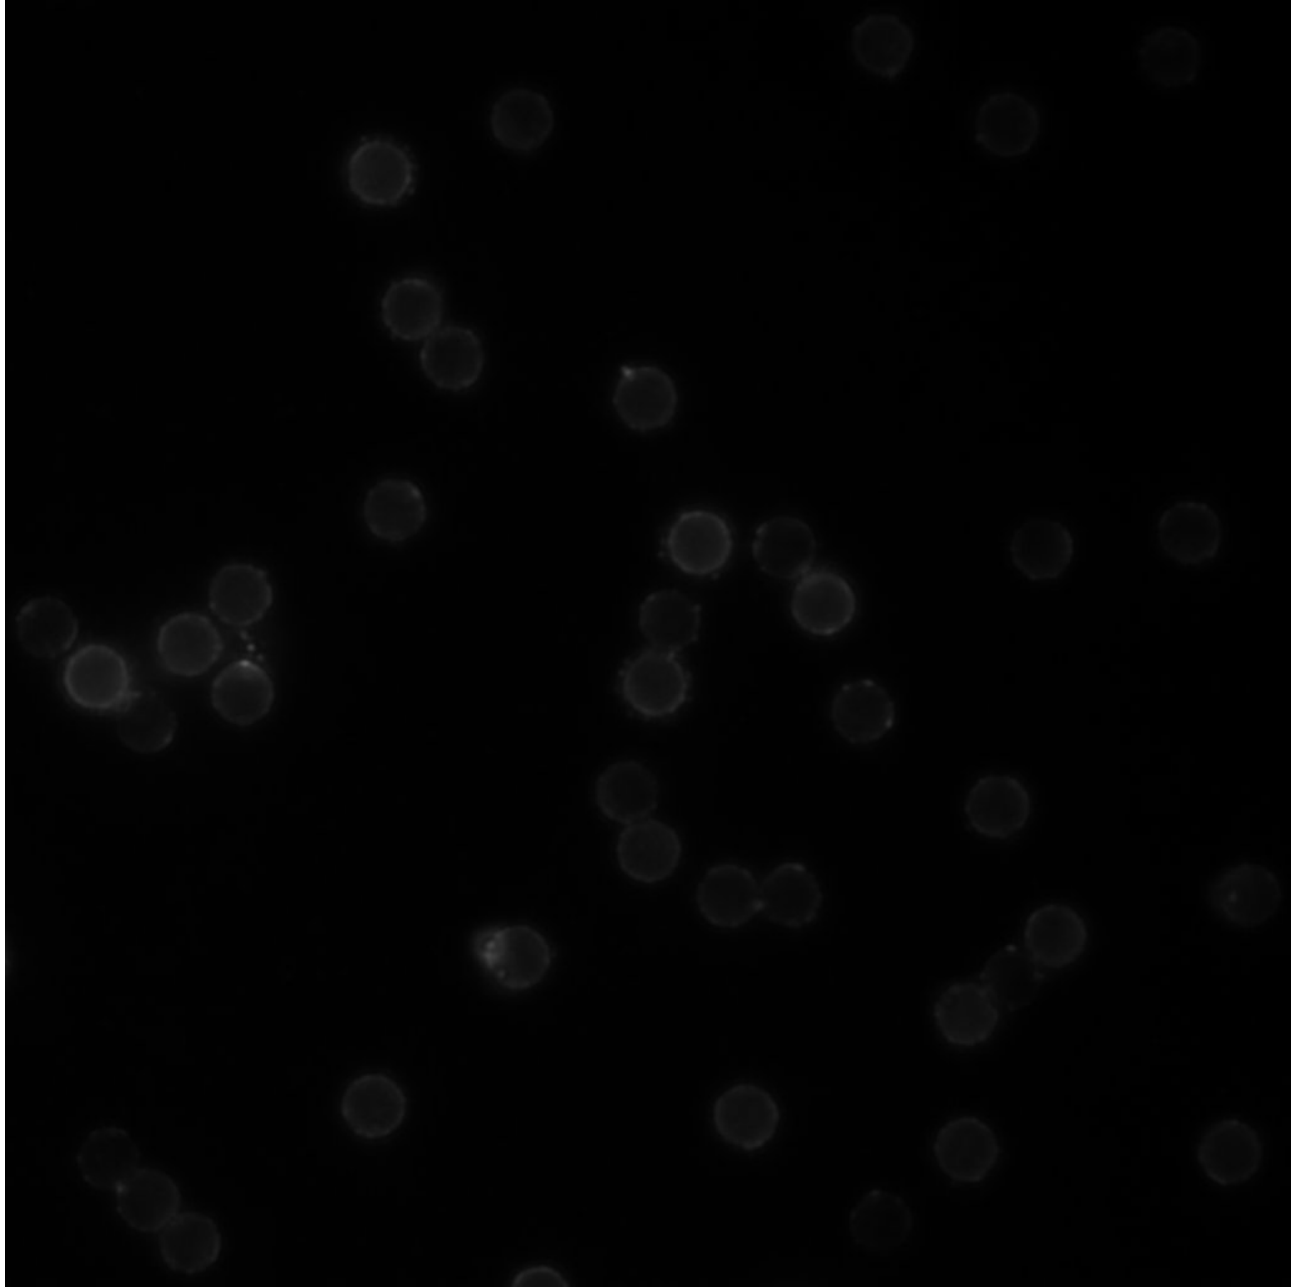

Supplement: NIHMS1792670-supplement-Source_data_EDF_2c_d.pdf [file NIHMS1792670-supplement-Source_data_EDF_2c_d.pdf]
