# Supplementary material
Source: PubMed Central journal article supplement (PMC9189060)

extfig\_10b.jpg (1/1)

2184 x 1472

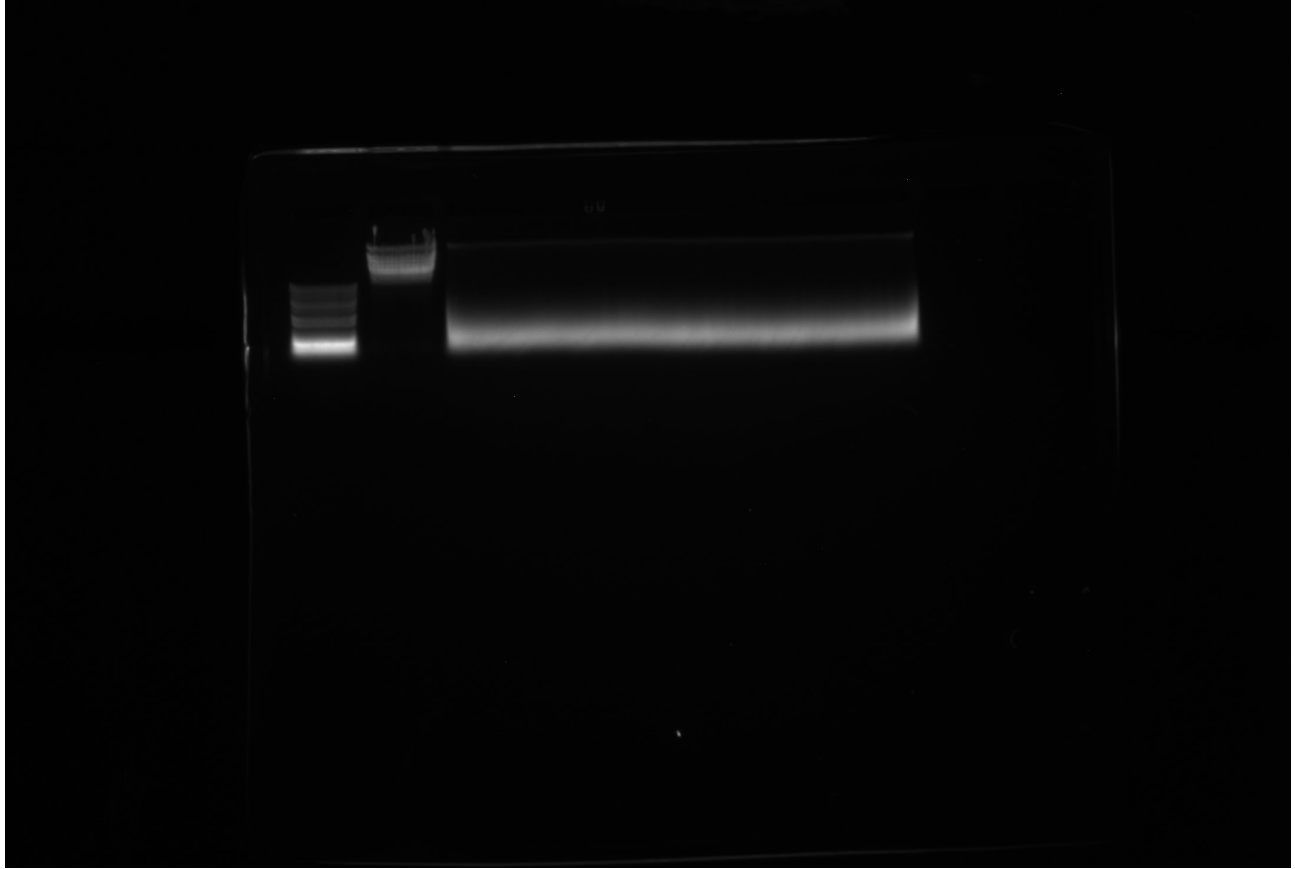

Supplement: NIHMS1792670-supplement-Source_data_EDF_10b.pdf [file NIHMS1792670-supplement-Source_data_EDF_10b.pdf]

extfig\_1a.jpg (1/1)

2184 x 1472

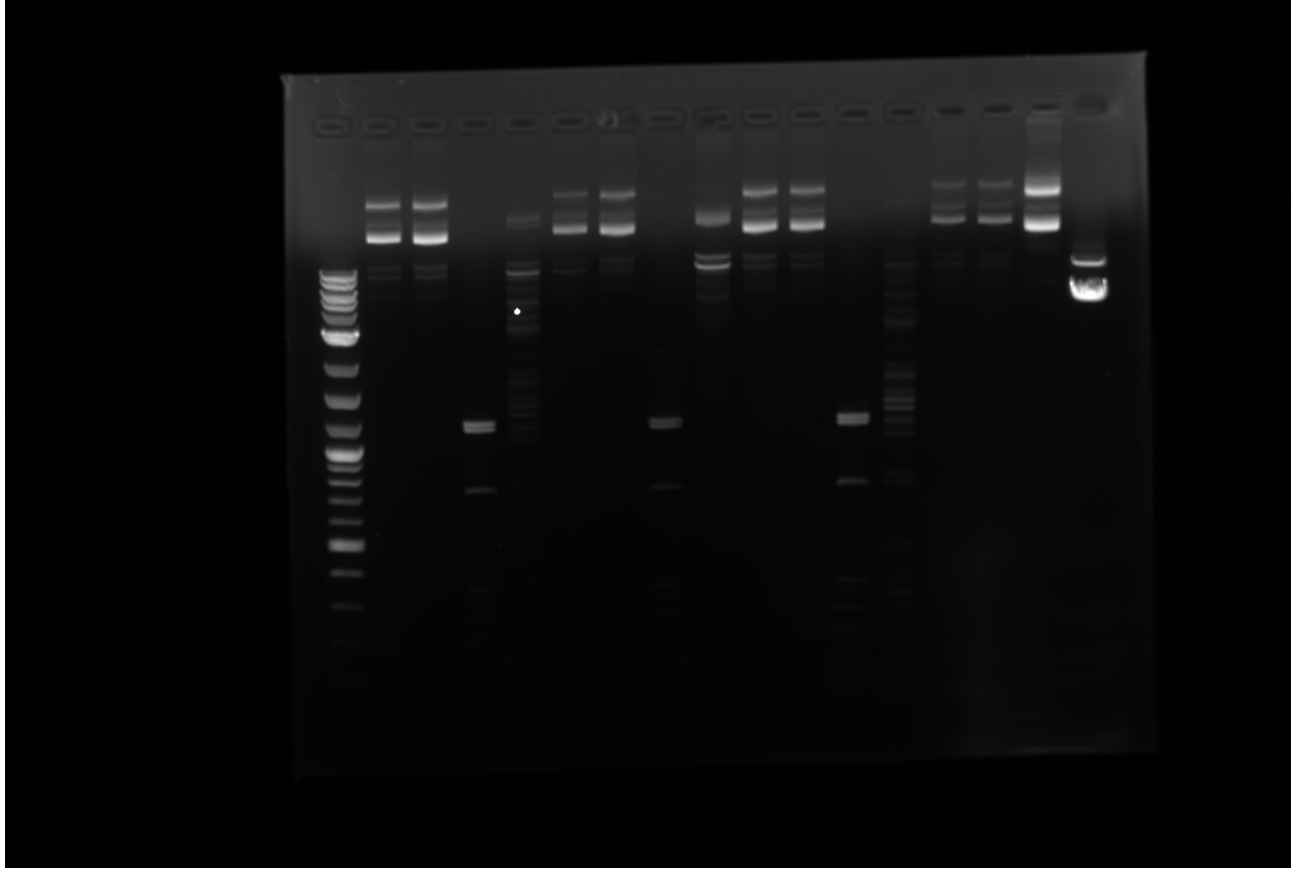

extfig\_1b.jpg (1/1)

1024 x 768

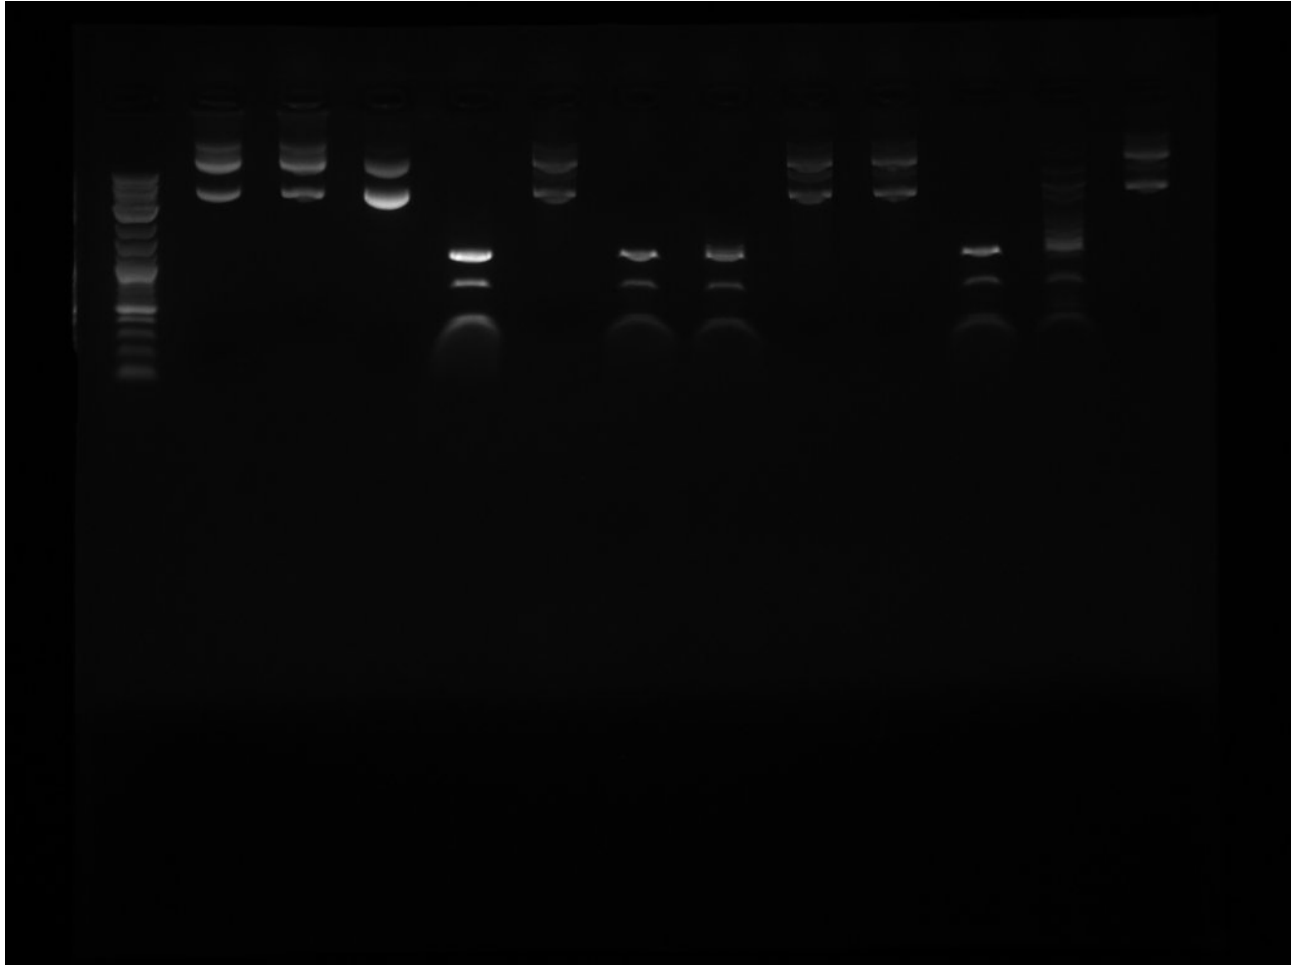

extfig\_1d.jpg (1/1)

2184 x 1472

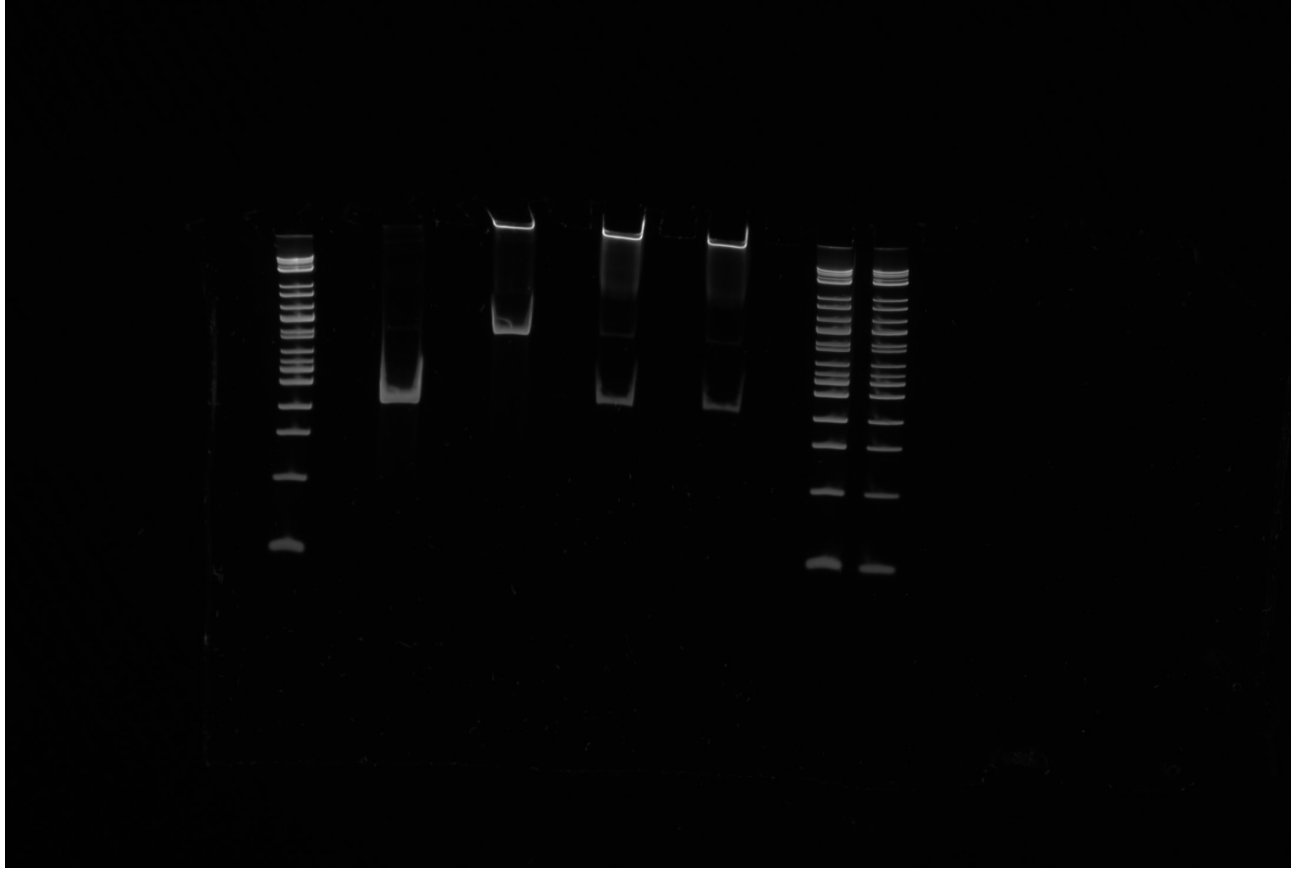

Supplement: NIHMS1792670-supplement-Source_data_EDF_1abd.pdf [file NIHMS1792670-supplement-Source_data_EDF_1abd.pdf]

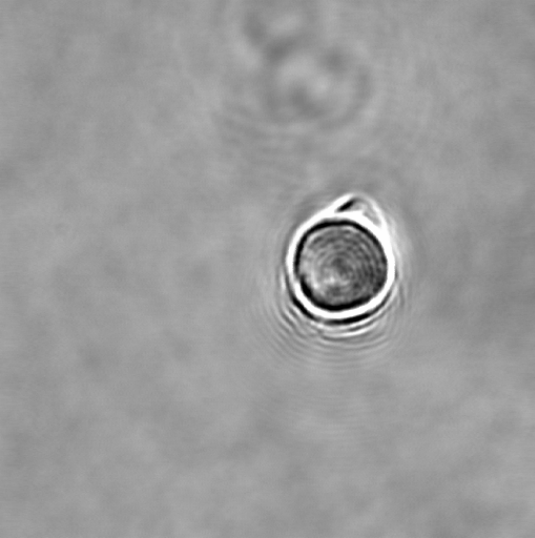





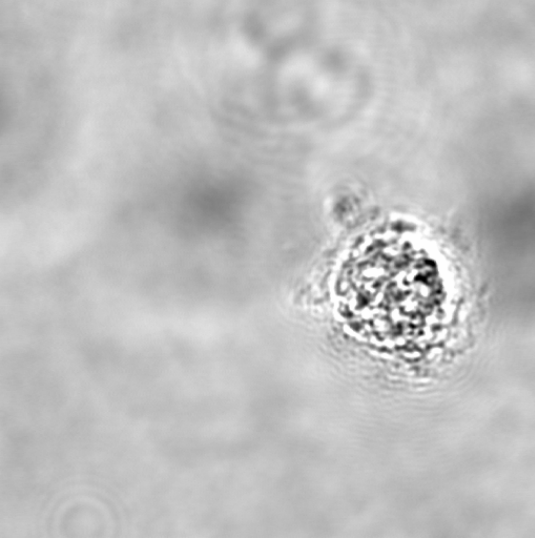





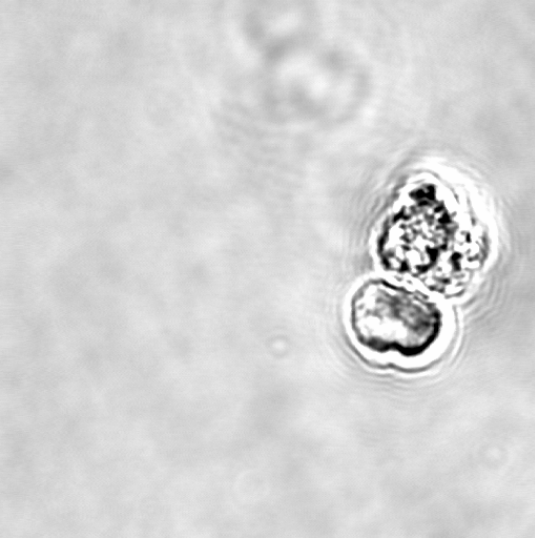







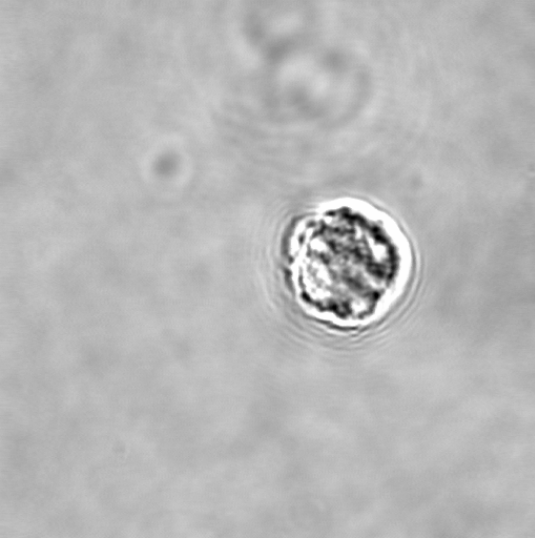





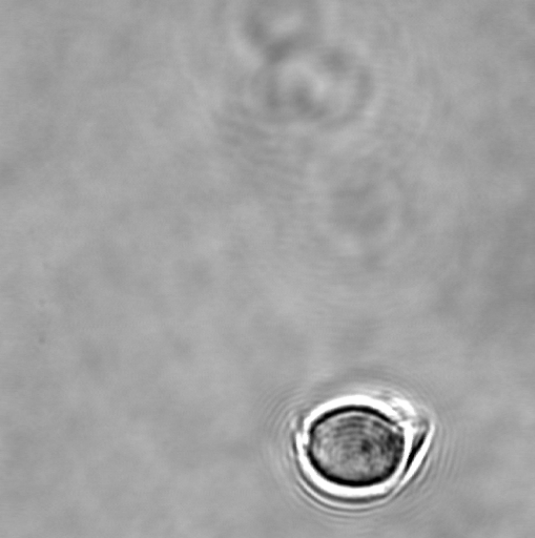

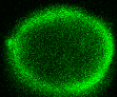



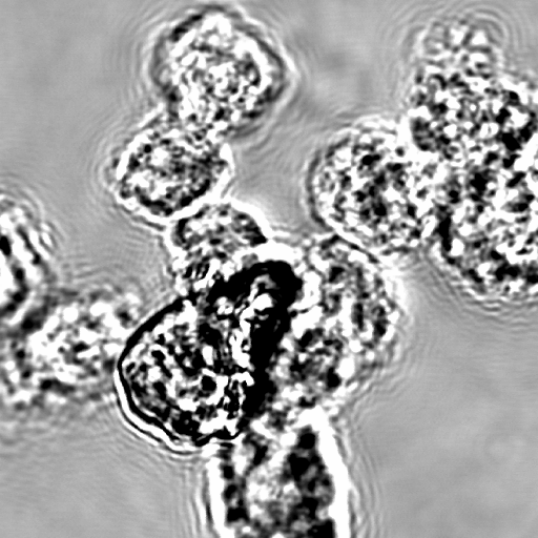







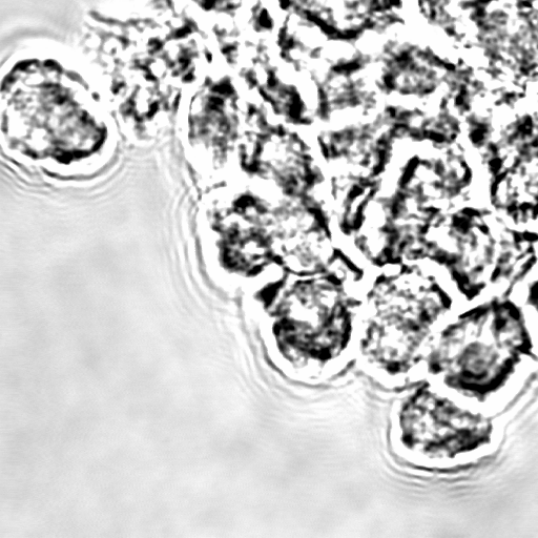

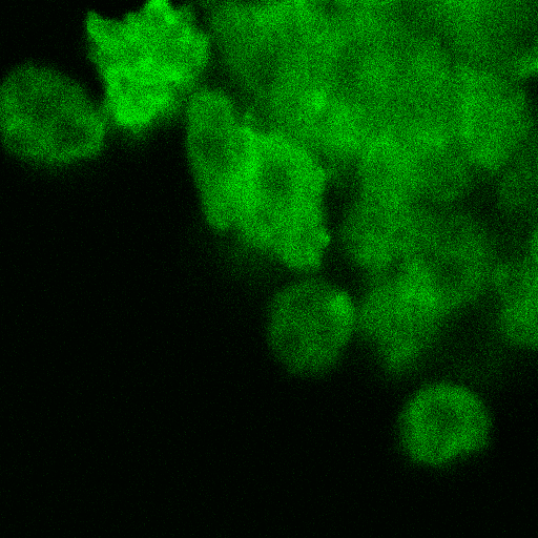



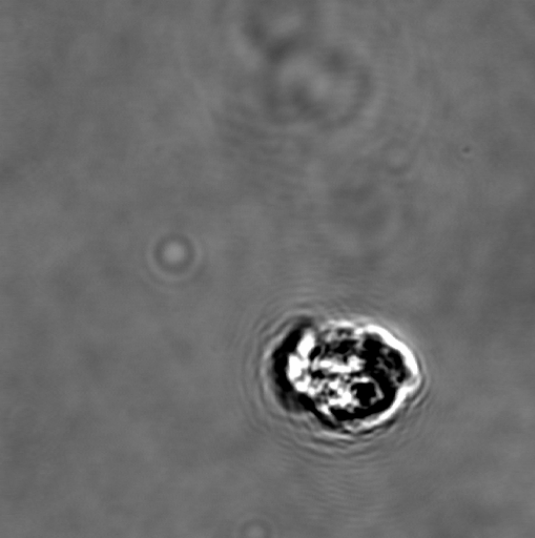

Supplement: NIHMS1792670-supplement-Source_data_EDF_3cd_IF_images.pdf [file NIHMS1792670-supplement-Source_data_EDF_3cd_IF_images.pdf]
